# Supplementary material for: Multi-omics sequencing revealed endostar combined with cisplatin treated non small cell lung cancer via anti-angiogenesis
Source: Springer Nature journal article supplement (doi:10.1186/s12885-023-11665-w), 2024-02-08
Supplement: MOESM1 [file 26714106]

Figure S1 Anti-tumor effect of endostar combined with cisplatin in vitro. A549 cells were treated with endostar, cisplatin or endostar + cisplatin. (A) Cell viability was measured by MTT. (B) Cell proliferation was determined by colony formation assay. (C) Wound healing assay was used to assess cell migration. (D) Flow cytometry was used to detect cell apoptosis. \*  $p < 0.05$ , \*\*  $p < 0.01$ , \*\*\*  $p < 0.001$ , compared to the corresponding group.

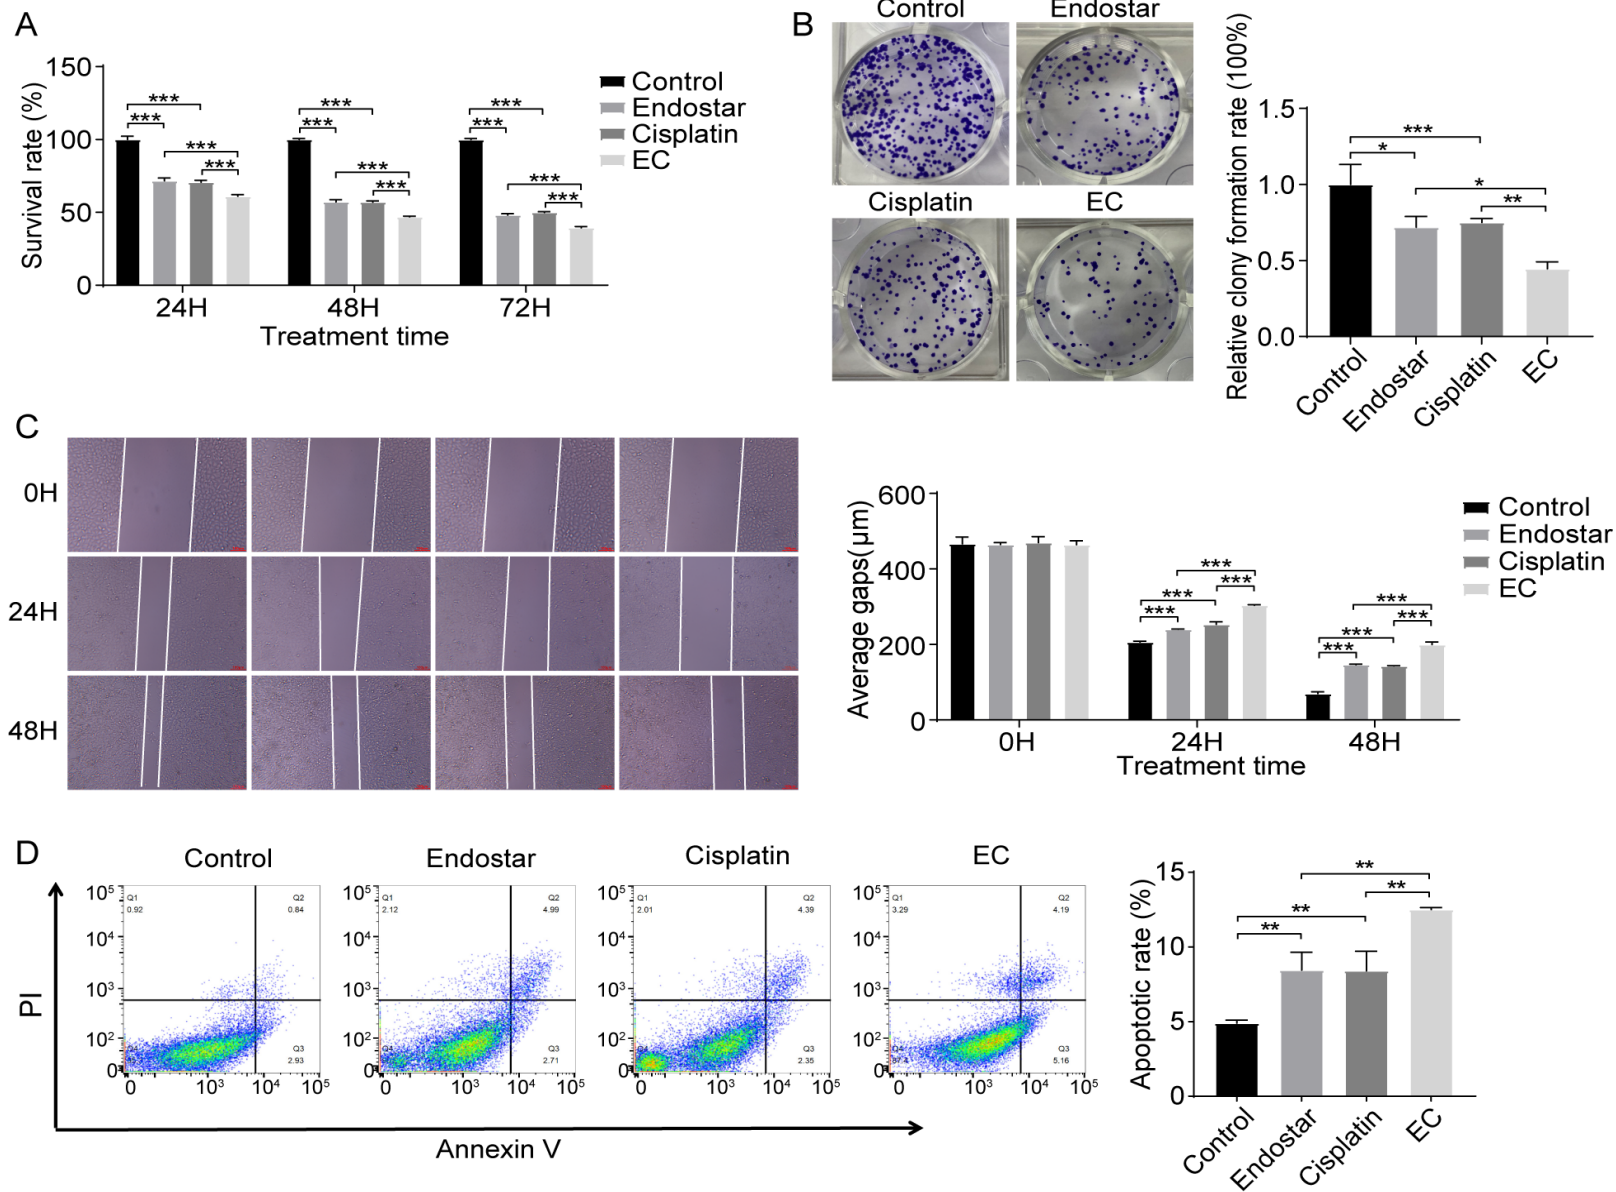

Figure S2. Top10 GO terms

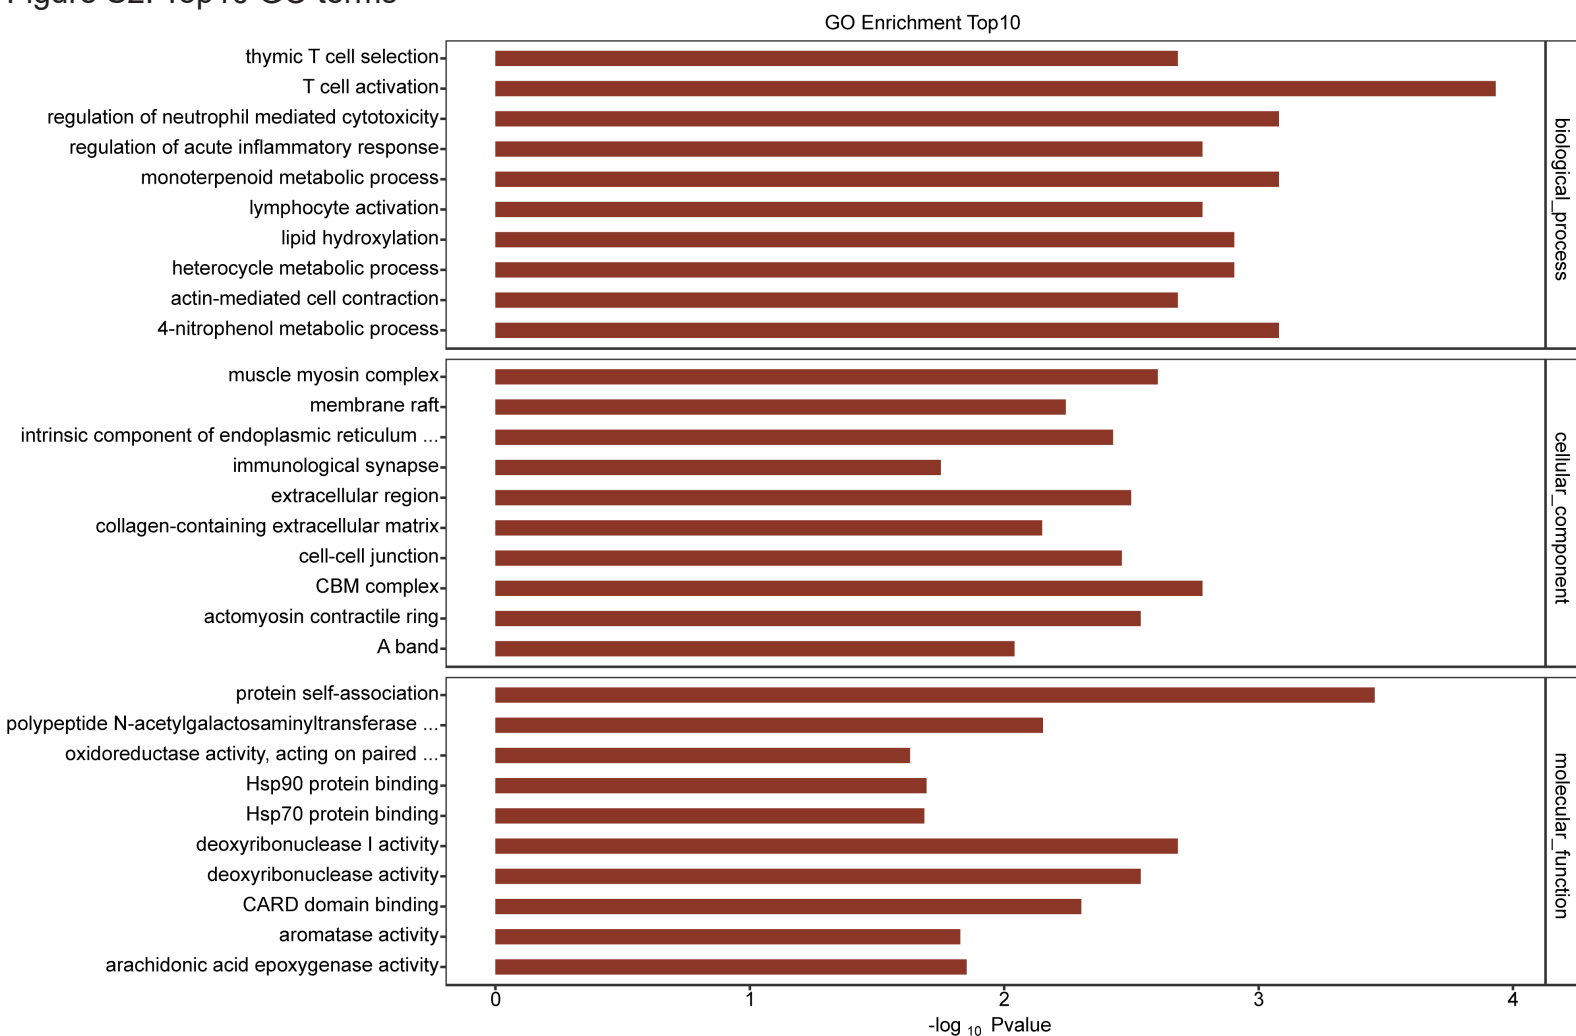

Figure S3. KEGG pathway enrichment analysis

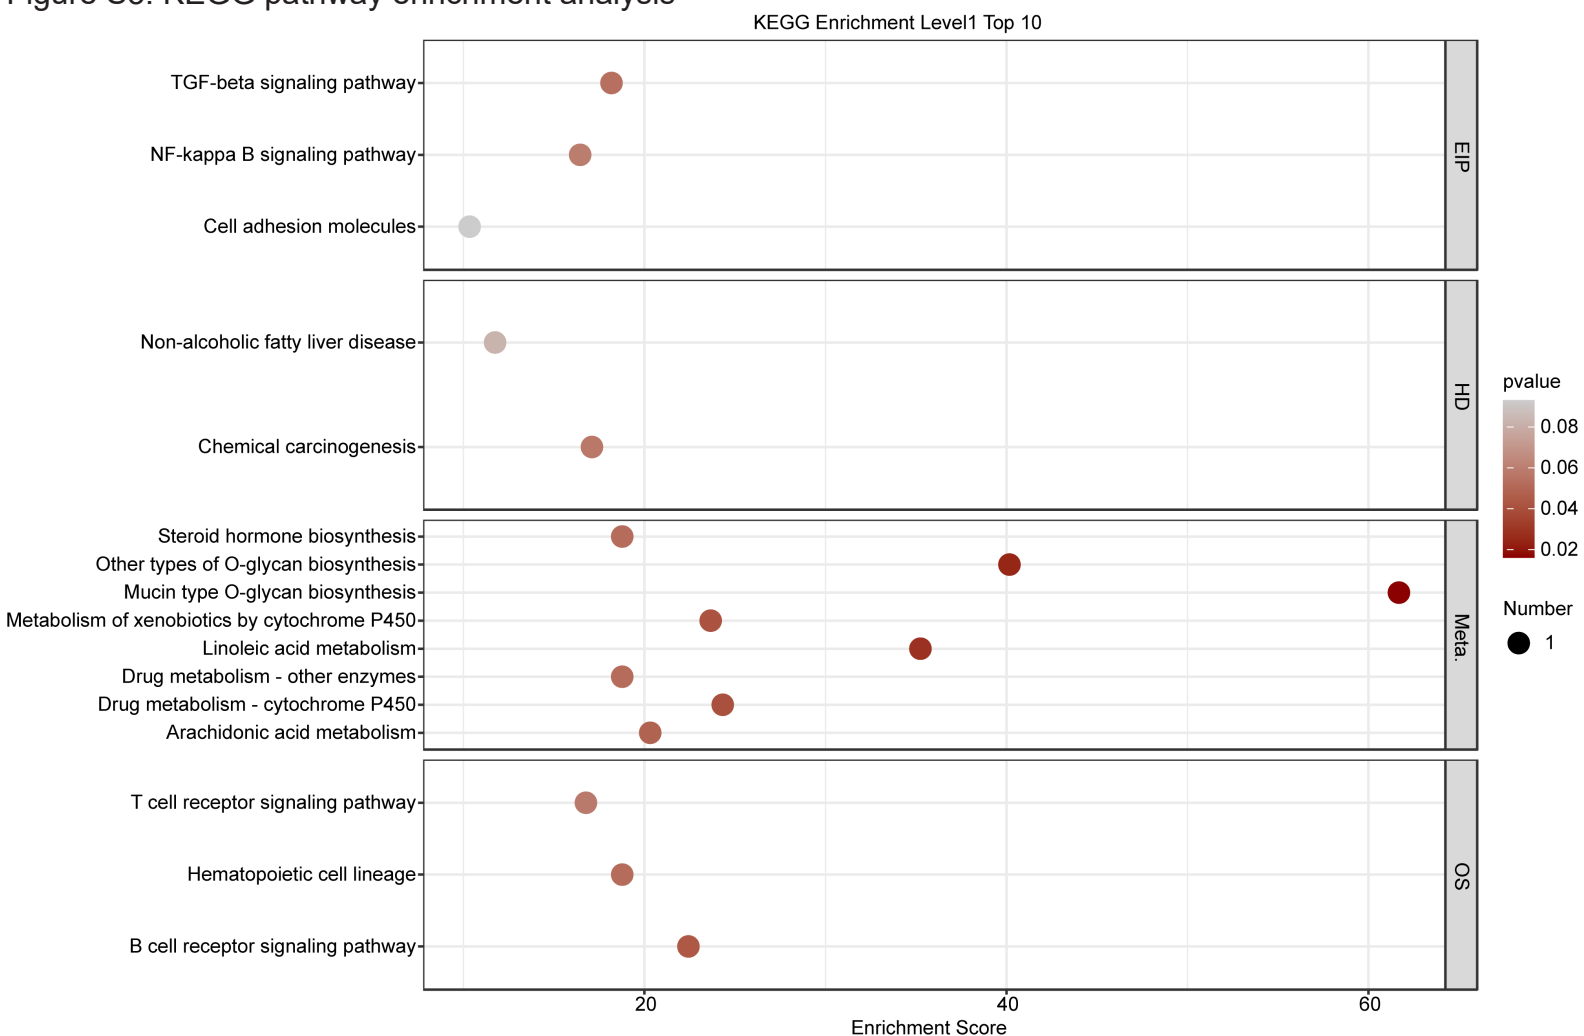

Figure S4 FMOD and METTL3 expression levels in A549 cell treated with endostar combined with cisplatin in vitro. A549 cells were treated with endostar, cisplatin or endostar + cisplatin. (A, B) The expression levels of FMOD and METTL3 in A549 cells were detected by western blotting. \*  $p < 0.05$ , \*\*  $p < 0.01$ , \*\*\*  $p < 0.001$ , compared to the corresponding group.

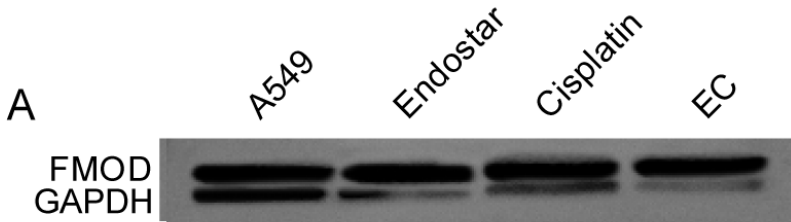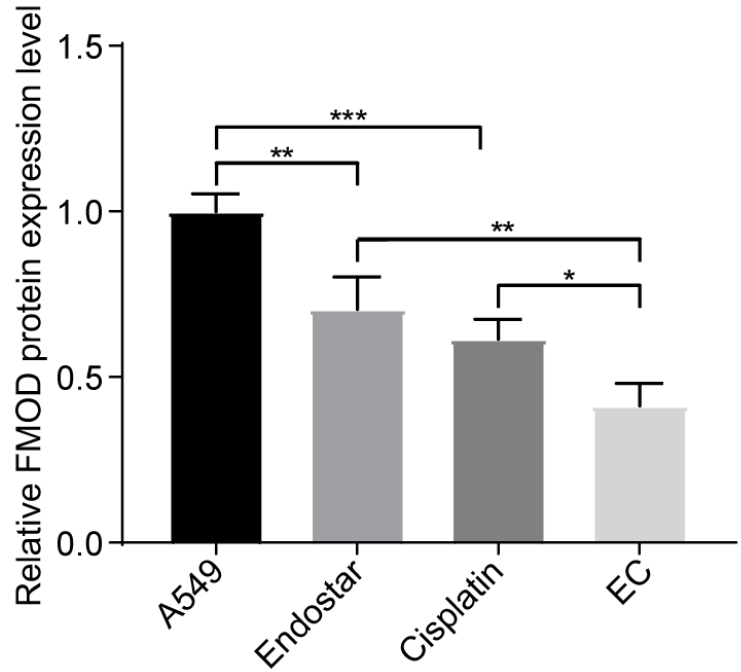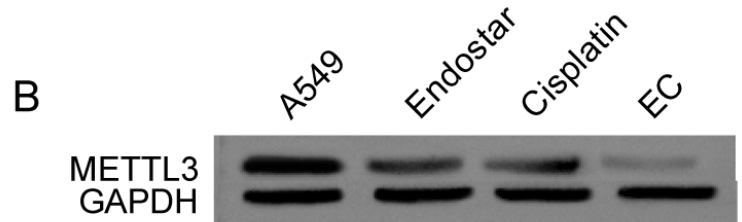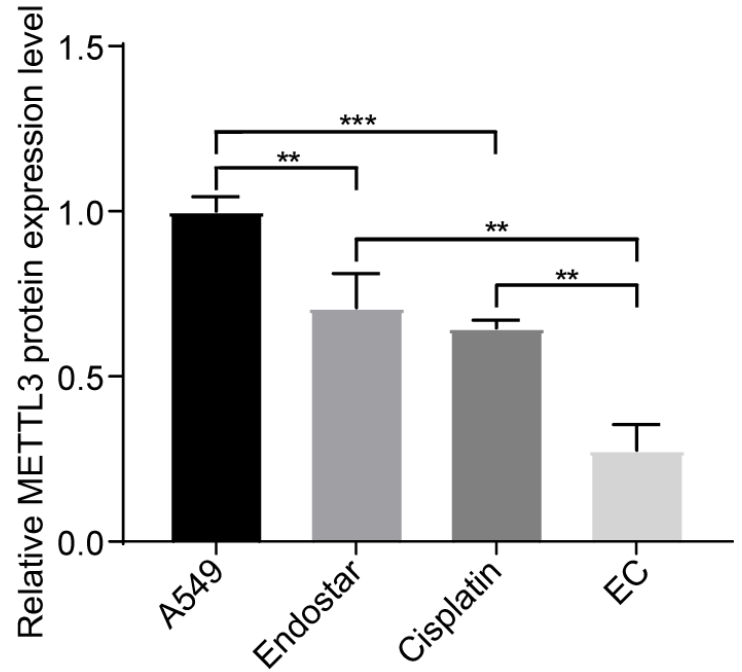

Figure S5 Full-length blot for Western blotting image-v3

S2H

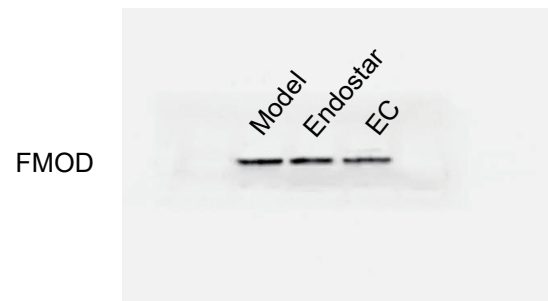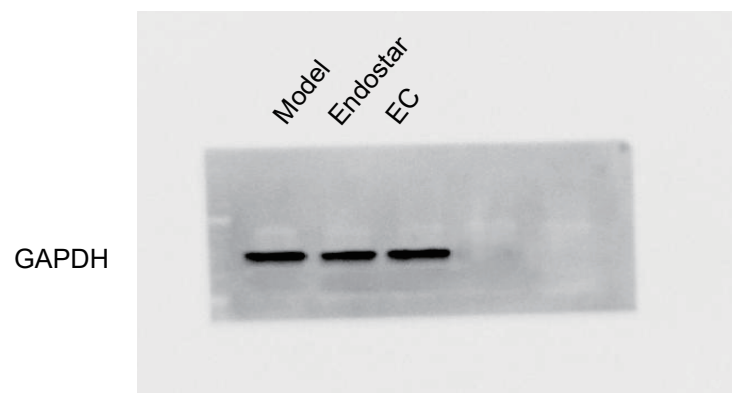

S3B

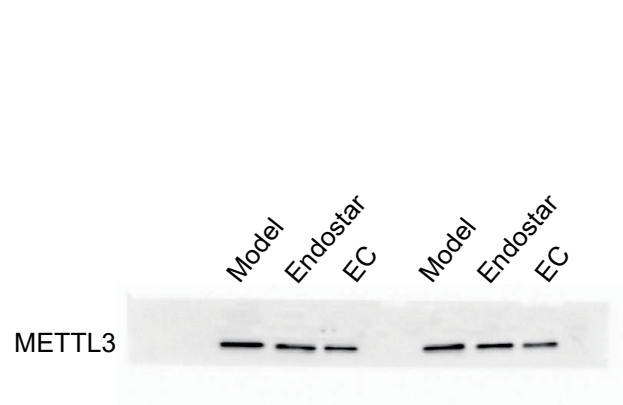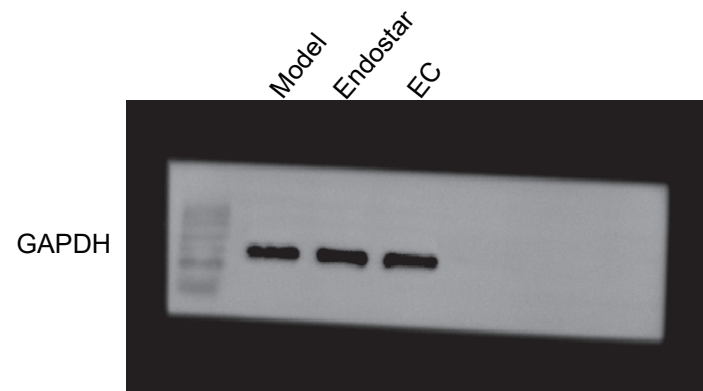

S4B

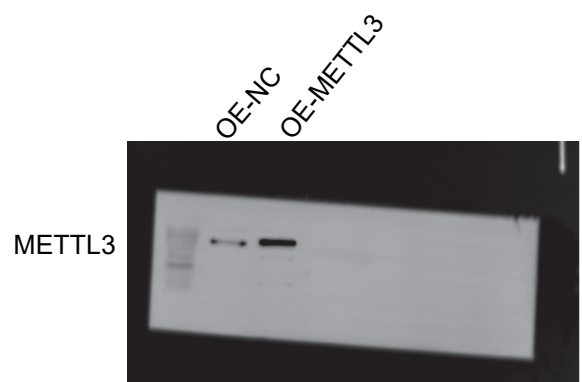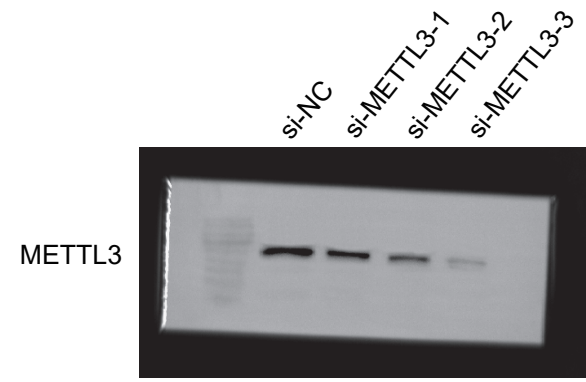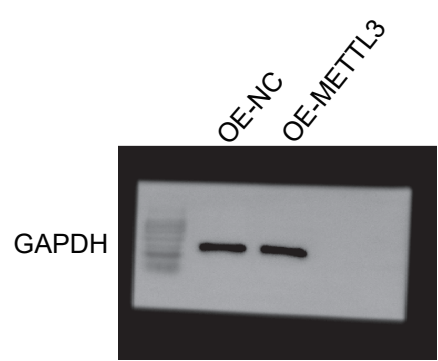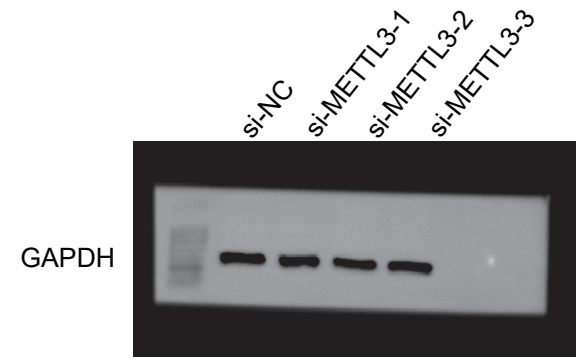

S5B

a b c d e

VEGF

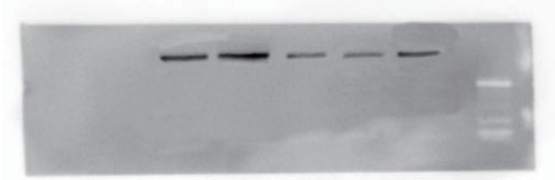

a b c d e

GAPDH

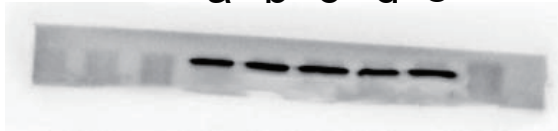

a b c d e

FGF-2

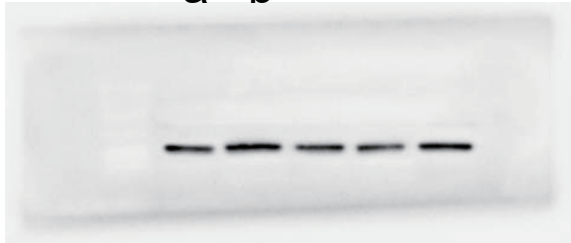

a b c d e

GAPDH

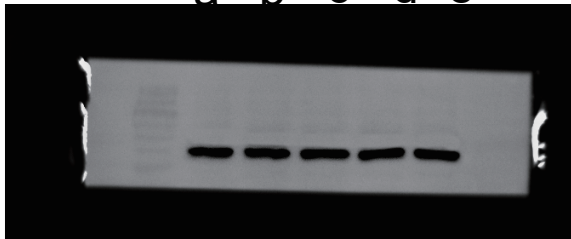

a b c d e

TGF- $\beta$ 1

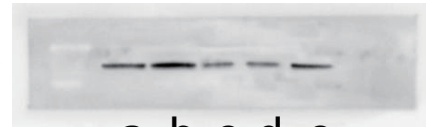

a b c d e

GAPDH

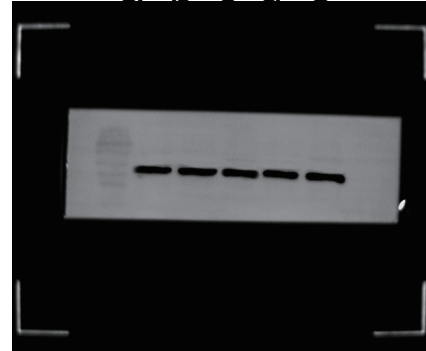

a b c d e

PDGF-B

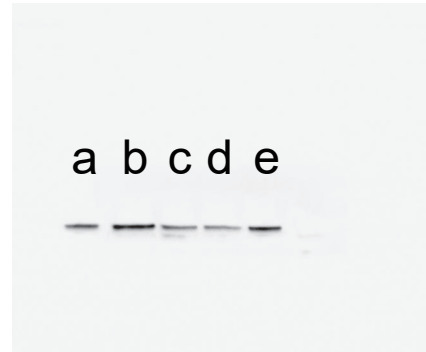

a b c d e

GAPDH

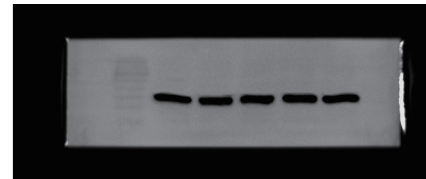

a: A549+HUVEC

b: A549+METTL3-OE+HUVEC

c: A549+METTL3-SI+HUVEC

d: A549+EC+HUVEC

e: A549+EC+METTL3-OE+HUVEC

# S7A

- a: A549
- b: A549+HUVEC
- c: A549+METTL3-OE+HUVEC
- d: A549+METTL3-SI+HUVEC
- e: A549+EC+HUVEC
- f: A549+EC+METTL3-OE+HUVEC

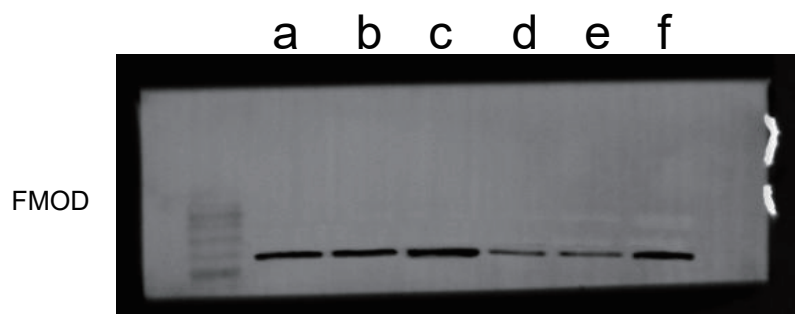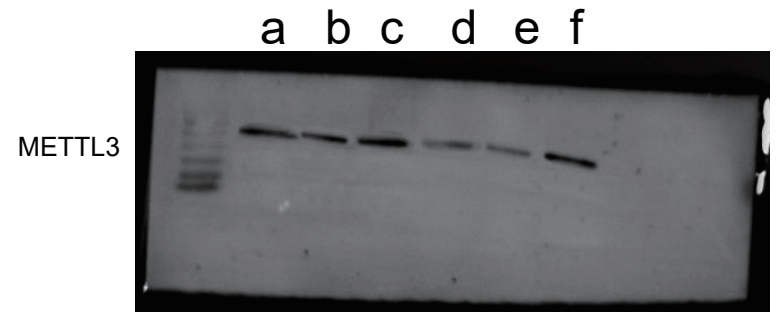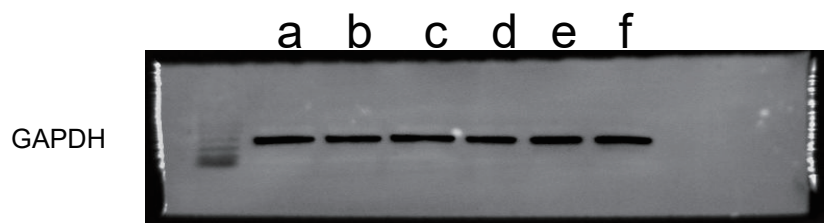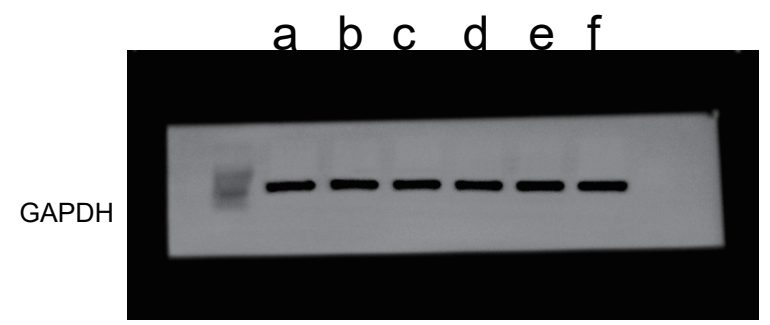

# S7A

- a: A549
- b: A549+HUVEC
- c: A549+METTL3-OE+HUVEC
- d: A549+METTL3-SI+HUVEC
- e: A549+EC+HUVEC
- f: A549+EC+METTL3-OE+HUVEC

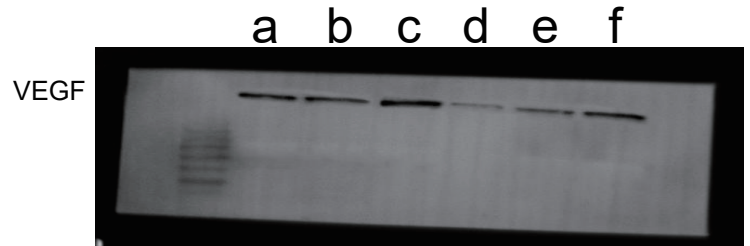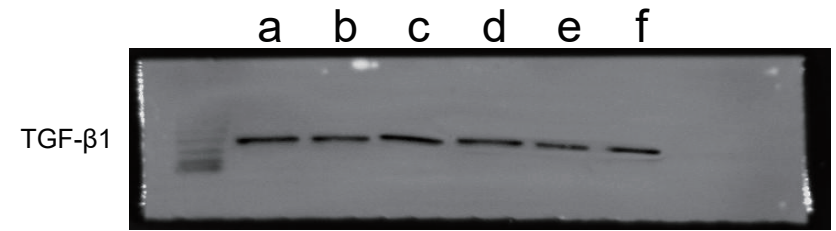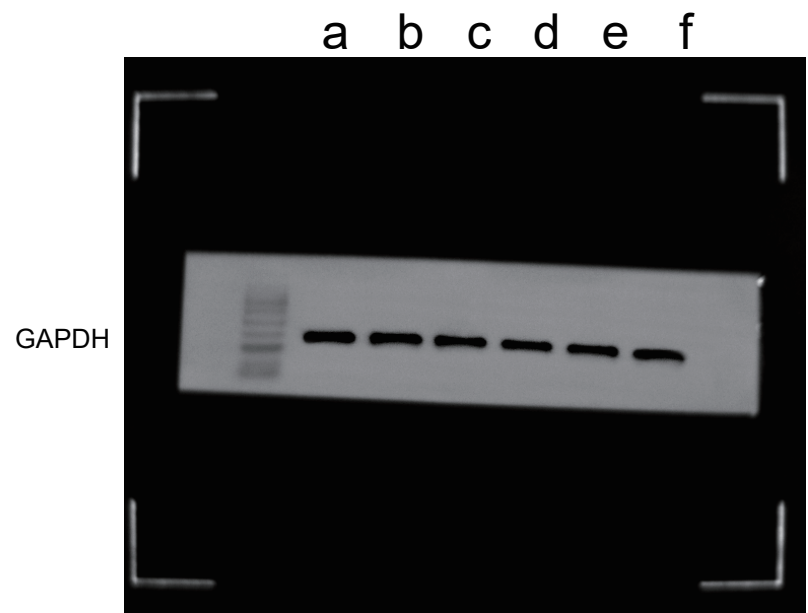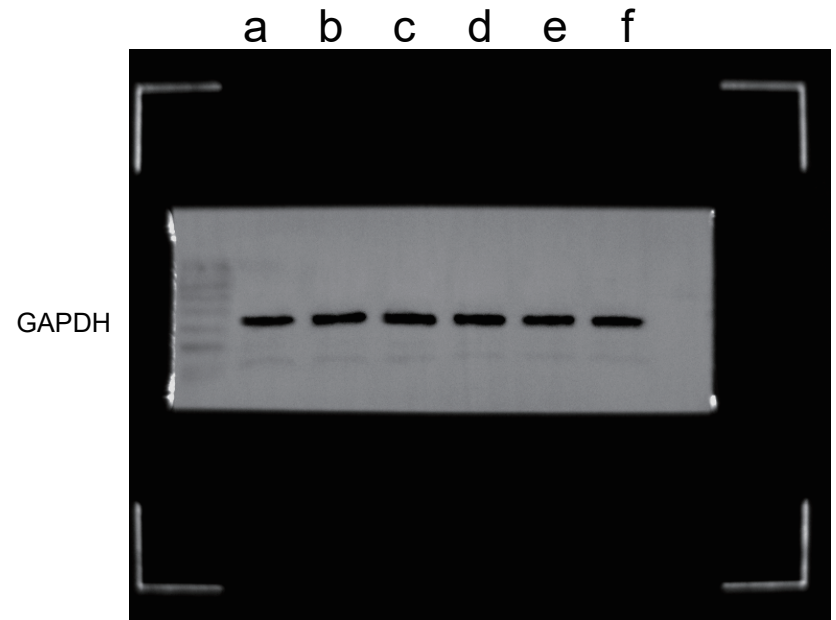



# S7A

- a: A549
- b: A549+HUVEC
- c: A549+METTL3-OE+HUVEC
- d: A549+METTL3-SI+HUVEC
- e: A549+EC+HUVEC
- f: A549+EC+METTL3-OE+HUVEC

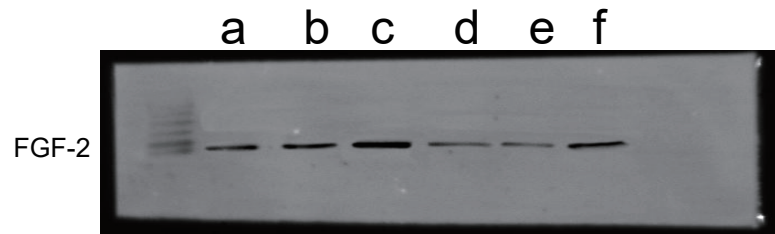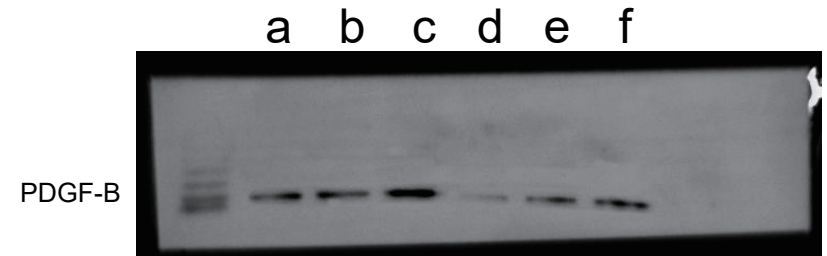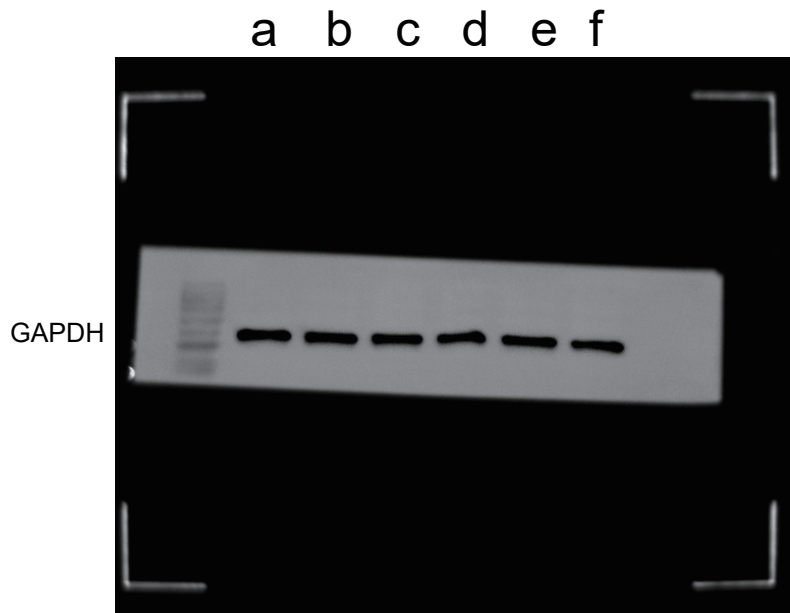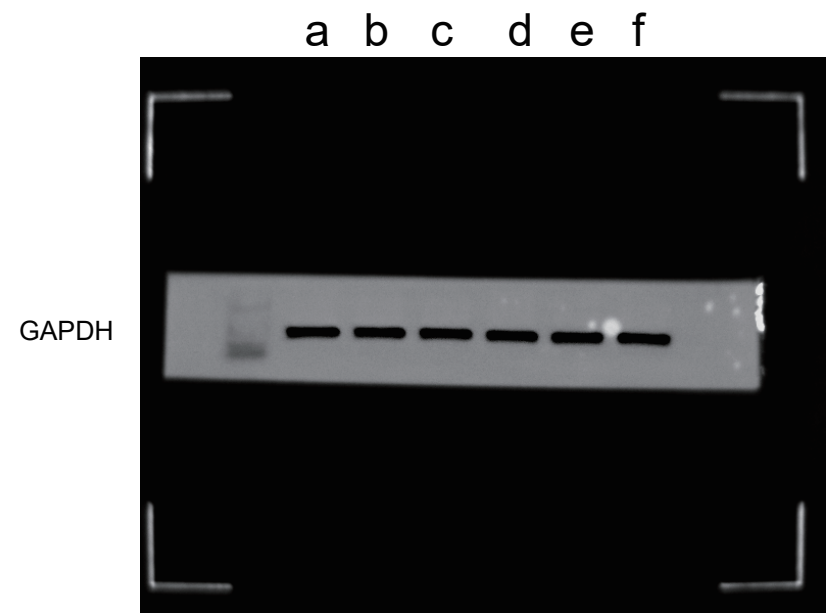

Table S1. The results of MTT

| MTT             |                 |                  |                  |                       |                       |                       |                           |
|-----------------|-----------------|------------------|------------------|-----------------------|-----------------------|-----------------------|---------------------------|
| 24H             |                 | Calibration well | A549+HU VEC      | A549+METT L3-OE+HUVEC | A549+ME TTL3-si+HUVEC | A549+EC+ HUVEC        | A549+EC+ METTTL3-OE+HUVEC |
|                 |                 | 0.037            | 0.618            | 0.719                 | 0.427                 | 0.431                 | 0.612                     |
|                 |                 | 0.034            | 0.613            | 0.734                 | 0.436                 | 0.441                 | 0.624                     |
|                 |                 | 0.041            | 0.62             | 0.723                 | 0.433                 | 0.429                 | 0.616                     |
|                 | Calibrated data | Calibration well | A549+HU VEC      | A549+METT L3-OE+HUVEC | A549+ME TTL3-si+HUVEC | A549+EC+ HUVEC        | A549+EC+ METTTL3-OE+HUVEC |
|                 |                 | 0                | 0.581            | 0.682                 | 0.39                  | 0.394                 | 0.575                     |
|                 |                 | 0                | 0.579            | 0.7                   | 0.402                 | 0.407                 | 0.59                      |
|                 |                 | 0                | 0.579            | 0.682                 | 0.392                 | 0.388                 | 0.575                     |
|                 | Cell viability  |                  | 100.00           | 117.38                | 67.13                 | 67.81                 | 98.97                     |
|                 |                 |                  | 100.00           | 120.90                | 69.43                 | 70.29                 | 101.90                    |
|                 |                 |                  | 100.00           | 117.79                | 67.70                 | 67.01                 | 99.31                     |
|                 | Mean            |                  | 100.00           | 118.69                | 68.09                 | 68.37                 | 100.06                    |
|                 | SD              |                  | 0.00             | 1.92                  | 1.20                  | 1.71                  | 1.60                      |
|                 | 48H             |                  | Calibration well | A549+HU VEC           | A549+METT L3-OE+HUVEC | A549+ME TTL3-si+HUVEC | A549+EC+ HUVEC            |
| 0.042           |                 |                  | 1.082            | 1.438                 | 0.598                 | 0.629                 | 1.081                     |
| 0.039           |                 |                  | 1.081            | 1.449                 | 0.614                 | 0.64                  | 1.086                     |
| 0.043           |                 |                  | 1.091            | 1.441                 | 0.611                 | 0.658                 | 1.078                     |
| Calibrated data |                 | Calibration well | A549+HU VEC      | A549+METT L3-OE+HUVEC | A549+ME TTL3-si+HUVEC | A549+EC+ HUVEC        | A549+EC+ METTTL3-OE+HUVEC |
|                 |                 | 0                | 1.04             | 1.396                 | 0.556                 | 0.587                 | 1.039                     |
|                 |                 | 0                | 1.042            | 1.41                  | 0.575                 | 0.601                 | 1.047                     |
|                 |                 | 0                | 1.048            | 1.398                 | 0.568                 | 0.615                 | 1.035                     |
| Cell viability  |                 |                  | 100.00           | 134.23                | 53.46                 | 56.44                 | 99.90                     |
|                 |                 |                  | 100.00           | 135.32                | 55.18                 | 57.68                 | 100.48                    |
|                 |                 |                  | 100.00           | 133.40                | 54.20                 | 58.68                 | 98.76                     |
| Mean            |                 |                  | 100.00           | 134.31                | 54.28                 | 57.60                 | 99.71                     |
| SD              |                 |                  | 0.00             | 0.96                  | 0.86                  | 1.12                  | 0.88                      |
| 72H             |                 |                  | Calibration well | A549+HU VEC           | A549+METT L3-OE+HUVEC | A549+ME TTL3-si+HUVEC | A549+EC+ HUVEC            |
|                 | 0.038           |                  | 1.609            | 1.839                 | 0.858                 | 0.851                 | 1.532                     |
|                 | 0.040           |                  | 1.520            | 1.759                 | 0.855                 | 0.856                 | 1.562                     |
|                 | 0.039           |                  | 1.568            | 1.836                 | 0.868                 | 0.871                 | 1.606                     |
|                 | Calibrated data | Calibration well | A549+HU VEC      | A549+METT L3-OE+HUVEC | A549+ME TTL3-si+HUVEC | A549+EC+ HUVEC        | A549+EC+ METTTL3-OE+HUVEC |
|                 |                 | 0                | 1.571            | 1.801                 | 0.82                  | 0.813                 | 1.494                     |
|                 |                 | 0                | 1.48             | 1.719                 | 0.815                 | 0.816                 | 1.522                     |
|                 |                 | 0                | 1.529            | 1.797                 | 0.829                 | 0.832                 | 1.567                     |
|                 | Cell viability  |                  | 100.00           | 114.64                | 52.20                 | 51.75                 | 95.10                     |
|                 |                 |                  | 100.00           | 116.15                | 55.07                 | 55.14                 | 102.84                    |
|                 |                 |                  | 100.00           | 117.53                | 54.22                 | 54.41                 | 102.49                    |
|                 | Mean            |                  | 100.00           | 116.11                | 53.83                 | 53.77                 | 100.14                    |
|                 | SD              |                  | 0.00             | 1.44                  | 1.48                  | 1.78                  | 4.37                      |
